# Supplementary material
Source: publisher figshare collection journal article supplement (https://asha.figshare.com/articles/dataset/_/19606150)
Supplement: Supplementary file [file 1]

**Supplemental Material S5.** Final models for all analyses with PPVT scores and final models for all analyses with age in months.

**Table S5.1.** Final models for word learning performance across training days, whole word score with PPVT.

| <b>Log Odds of Producing a Word Correctly</b> |                 |                       |                |                    |
|-----------------------------------------------|-----------------|-----------------------|----------------|--------------------|
|                                               | <b>Estimate</b> | <b>Standard Error</b> | <b>z value</b> | <b>Pr(&gt; z )</b> |
| Intercept                                     | −1.43           | 0.33                  | −4.35          | < 0.0001           |
| Day <sup>a</sup>                              | 0.62            | 0.05                  | 11.40          | < 0.0001           |
| Time <sup>b</sup>                             | 0.73            | 0.09                  | 7.98           | < 0.0001           |
| PPVT                                          | 0.03            | 0.01                  | 2.31           | 0.02               |
| PPVT × Time                                   | 0.003           | 0.01                  | 0.42           | 0.67               |
| Biological Sex <sup>c</sup>                   | −0.004          | 0.38                  | −0.01          | 0.99               |
| Maternal Ed                                   | 0.04            | 0.10                  | 0.36           | 0.72               |

<sup>a</sup>Day 2 was coded as 0 to reflect performance at the intercept. <sup>b</sup>Beginning of session was coded as −.05. End of session was coded as .05. <sup>c</sup>Female was coded as −.05. Male was coded as .05.

**Table S5.2.** Final models for word learning performance across training days, phonological precision score with PPVT.

| <b>Percentage of Phonetic Features Produced correctly</b> |                 |                       |                |                    |
|-----------------------------------------------------------|-----------------|-----------------------|----------------|--------------------|
|                                                           | <b>Estimate</b> | <b>Standard Error</b> | <b>t value</b> | <b>Pr(&gt; z )</b> |
| Intercept                                                 | 0.34            | 0.06                  | 5.62           | < 0.0001           |
| Day <sup>a</sup>                                          | 0.11            | 0.01                  | 11.97          | < 0.0001           |
| Time <sup>b</sup>                                         | 0.12            | 0.02                  | 7.82           | < 0.0001           |
| PPVT                                                      | 0.01            | 0.002                 | 1.92           | 0.06               |
| PPVT × Time                                               | 0.0001          | 0.001                 | 0.10           | 0.92               |
| Biological Sex <sup>c</sup>                               | 0.03            | 0.06                  | 0.50           | 0.62               |
| Maternal Ed                                               | 0.02            | 0.02                  | 0.96           | 0.34               |

<sup>a</sup>Day 2 was coded as 0 to reflect performance at the intercept. <sup>b</sup>Beginning of session was coded as −.05. End of session was coded as .05. <sup>c</sup>Female was coded as −.05. Male was coded as .05.

**Table S5.3.** Final models for consolidation during training, whole word score with PPVT.

| <b>Log Odds of Producing a Word Correctly</b> |                 |                       |                |                    |
|-----------------------------------------------|-----------------|-----------------------|----------------|--------------------|
|                                               | <b>Estimate</b> | <b>Standard Error</b> | <b>z value</b> | <b>Pr(&gt; z )</b> |
| Intercept                                     | −2.05           | 0.33                  | −6.18          | < 0.0001           |
| Gap <sup>a</sup>                              | 0.71            | 0.04                  | 16.47          | < 0.0001           |
| Time <sup>b</sup>                             | −0.01           | 0.09                  | −0.15          | 0.88               |
| PPVT                                          | 0.04            | 0.01                  | 2.70           | < 0.01             |
| PPVT × Time                                   | −0.003          | 0.01                  | −0.42          | 0.67               |
| Biological Sex <sup>c</sup>                   | −0.07           | 0.35                  | −0.189         | 0.86               |
| Maternal Ed                                   | 0.03            | 0.09                  | 0.31           | 0.75               |

<sup>a</sup>Gap 1 was coded as 0 to reflect performance at the intercept. <sup>b</sup>Beginning of session was coded as −.05. End of session was coded as .05. <sup>c</sup>Female was coded as −.05. Male was coded as .05.

**Table S5.4.** Final models for consolidation during training, phonological precision score with PPVT.

| Percentage of Phonetic Features Produced correctly |          |                |                |                   |
|----------------------------------------------------|----------|----------------|----------------|-------------------|
|                                                    | Estimate | Standard Error | <i>t</i> value | Pr(>  <i>z</i>  ) |
| Intercept                                          | 0.26     | 0.05           | 5.17           | < 0.001           |
| Gap <sup>a</sup>                                   | 0.12     | 0.01           | 10.32          | < 0.0001          |
| Time <sup>b</sup>                                  | 0.003    | 0.02           | 0.22           | 0.83              |
| PPVT                                               | 0.002    | 0.002          | 1.14           | 0.26              |
| PPVT × Time                                        | −0.001   | 0.001          | −0.91          | 0.36              |
| Biological Sex <sup>c</sup>                        | 0.03     | 0.05           | 0.52           | 0.60              |
| Maternal Ed                                        | 0.01     | 0.01           | 0.99           | 0.33              |

<sup>a</sup>Gap 1 was coded as 0 to reflect performance at the intercept. <sup>b</sup>Beginning of session was coded as −.05. End of session was coded as .05. <sup>c</sup>Female was coded as −.05. Male was coded as .05.

**Table S5.5.** Final models assessing the effect of delay (end of training, one-month delay) on production of words, whole word score with PPVT.

| Log Odds of Producing a Word Correctly |          |                |                |                   |
|----------------------------------------|----------|----------------|----------------|-------------------|
|                                        | Estimate | Standard Error | <i>z</i> value | Pr(>  <i>z</i>  ) |
| Intercept                              | 0.18     | 0.31           | 0.59           | 0.56              |
| Time <sup>a</sup>                      | −0.66    | 0.17           | −3.93          | < 0.0001          |
| PPVT                                   | 0.03     | 0.01           | 1.94           | 0.05              |
| PPVT × Time                            | 0.0005   | 0.01           | 0.04           | 0.97              |
| Biological Sex <sup>b</sup>            | −0.12    | 0.34           | −0.34          | 0.73              |
| Condition, Contrast 1 <sup>c</sup>     | −0.10    | 0.21           | −0.48          | 0.63              |
| Condition, Contrast 2 <sup>d</sup>     | 0.16     | 0.12           | 1.39           | 0.17              |
| Condition × Time, Contrast 1           | 0.33     | 0.21           | 1.61           | 0.11              |
| Condition × Time, Contrast 2           | −0.07    | 0.12           | −0.56          | 0.58              |
| Maternal Ed                            | 0.09     | 0.09           | 1.00           | 0.32              |

<sup>a</sup>End of last training session was coded as −.05. Beginning of one-month session was coded as .05. <sup>b</sup>Female was coded as −.05. Male was coded as .05. <sup>c</sup>Retest at one week was coded as −1, Retest at two weeks was coded as 1, No retest was coded as 0. <sup>d</sup>Retest at one week was coded as −1, Retest at two weeks was coded as −1, No retest was coded as 2.

**Table S5.6.** Final models assessing the effect of delay (end of training, one-month delay) on production of words, phonological precision score with PPVT.

| <b>Percentage of Phonetic Features Produced correctly</b> |                 |                       |                |                    |
|-----------------------------------------------------------|-----------------|-----------------------|----------------|--------------------|
|                                                           | <b>Estimate</b> | <b>Standard Error</b> | <b>t value</b> | <b>Pr(&gt; z )</b> |
| Intercept                                                 | 0.59            | 0.06                  | 9.39           | < 0.0001           |
| Time <sup>a</sup>                                         | −0.13           | 0.03                  | −4.40          | < 0.0001           |
| PPVT                                                      | 0.003           | 0.003                 | 1.39           | 0.17               |
| PPVT × Time                                               | 0.001           | 0.002                 | 0.47           | 0.64               |
| Biological Sex <sup>b</sup>                               | 0.02            | 0.07                  | 0.25           | 0.81               |
| Condition, Contrast 1 <sup>c</sup>                        | −0.03           | 0.04                  | −0.60          | 0.55               |
| Condition, Contrast 2 <sup>d</sup>                        | 0.03            | 0.02                  | 1.20           | 0.24               |
| Condition × Time, Contrast 1                              | 0.08            | 0.04                  | 2.30           | 0.02               |
| Condition × Time, Contrast 2                              | 0.001           | 0.02                  | 0.05           | 0.96               |
| Maternal Ed                                               | 0.02            | 0.02                  | 1.18           | 0.24               |

<sup>a</sup>End of last training session was coded as −.05. Beginning of one-month session was coded as .05. <sup>b</sup>Female was coded as −.05. Male was coded as .05. <sup>c</sup>Retest at one week was coded as −1, Retest at two weeks was coded as 1, No retest was coded as 0. <sup>d</sup>Retest at one week was coded as −1, Retest at two weeks was coded as −1, No retest was coded as 2.

**Table S5.7.** Final models for word learning performance across training days, whole word score with age in months.

| <b>Log Odds of Producing a Word Correctly</b> |                 |                       |                |                    |
|-----------------------------------------------|-----------------|-----------------------|----------------|--------------------|
|                                               | <b>Estimate</b> | <b>Standard Error</b> | <b>z value</b> | <b>Pr(&gt; z )</b> |
| Intercept                                     | −1.42           | 0.34                  | −4.21          | < 0.0001           |
| Day <sup>a</sup>                              | 0.58            | 0.04                  | 14.43          | < 0.0001           |
| Time <sup>b</sup>                             | 0.73            | 0.09                  | 7.98           | < 0.0001           |
| Age in months                                 | 0.04            | 0.02                  | 1.81           | 0.07               |
| Age × Time                                    | 0.01            | 0.01                  | 1.39           | 0.16               |
| Biological Sex <sup>c</sup>                   | 0.17            | 0.39                  | 0.43           | 0.67               |
| Maternal Ed                                   | 0.09            | 0.11                  | 0.83           | 0.40               |

<sup>a</sup>Day 2 was coded as 0 to reflect performance at the intercept. <sup>b</sup>Beginning of session was coded as −.05. End of session was coded as .05. <sup>c</sup>Female was coded as −.05. Male was coded as .05.

**Table S5.8.** Final models for word learning performance across training days, phonological precision score with age in months.

| Percentage of Phonetic Features Produced correctly |          |                |                |                   |
|----------------------------------------------------|----------|----------------|----------------|-------------------|
|                                                    | Estimate | Standard Error | <i>t</i> value | Pr(>  <i>z</i>  ) |
| Intercept                                          | 0.34     | 0.06           | 5.59           | < 0.0001          |
| Day <sup>a</sup>                                   | 0.11     | 0.01           | 12.00          | < 0.0001          |
| Time <sup>b</sup>                                  | 0.12     | 0.01           | 7.90           | < 0.0001          |
| Age in months                                      | 0.01     | 0.004          | 1.53           | 0.13              |
| Age × Time                                         | 0.001    | 0.002          | 0.77           | 0.44              |
| Biological Sex <sup>c</sup>                        | 0.07     | 0.06           | 1.04           | 0.30              |
| Maternal Ed                                        | 0.02     | 0.02           | 1.30           | 0.20              |

<sup>a</sup>Day 2 was coded as 0 to reflect performance at the intercept. <sup>b</sup>Beginning of session was coded as −.05. End of session was coded as .05. <sup>c</sup>Female was coded as −.05. Male was coded as .05.

**Table S5.9.** Final models for consolidation during training, whole word score with age in months.

| Log Odds of Producing a Word Correctly |          |                |                |                   |
|----------------------------------------|----------|----------------|----------------|-------------------|
|                                        | Estimate | Standard Error | <i>z</i> value | Pr(>  <i>z</i>  ) |
| Intercept                              | −2.05    | 0.34           | −6.09          | < 0.0001          |
| Gap <sup>a</sup>                       | 0.71     | 0.04           | 16.44          | < 0.0001          |
| Time <sup>b</sup>                      | −0.01    | 0.09           | −0.12          | 0.90              |
| Age in months                          | 0.04     | 0.02           | 1.81           | 0.07              |
| Age × Time                             | 0.01     | 0.01           | 1.03           | 0.30              |
| Biological Sex <sup>c</sup>            | 0.20     | 0.37           | 0.54           | 0.59              |
| Maternal education                     | 0.08     | 0.10           | 0.77           | 0.44              |

<sup>a</sup>Gap 1 was coded as 0 to reflect performance at the intercept. <sup>b</sup>Beginning of session was coded as −.05. End of session was coded as .05. <sup>c</sup>Female was coded as −.05. Male was coded as .05.

**Table S5.10.** Final models for consolidation during training, phonological precision score with age in months.

| Percentage of Phonetic Features Produced correctly |          |                |                |                   |
|----------------------------------------------------|----------|----------------|----------------|-------------------|
|                                                    | Estimate | Standard Error | <i>t</i> value | Pr(>  <i>z</i>  ) |
| Intercept                                          | 0.26     | 0.05           | 5.20           | < 0.001           |
| Gap <sup>a</sup>                                   | 0.12     | 0.01           | 10.39          | < 0.0001          |
| Time <sup>b</sup>                                  | 0.005    | 0.01           | 0.37           | 0.71              |
| Age in months                                      | 0.005    | 0.003          | 1.79           | 0.08              |
| Age × Time                                         | 0.001    | 0.002          | 0.69           | 0.49              |
| Biological Sex <sup>c</sup>                        | 0.05     | 0.05           | 1.01           | 0.32              |
| Maternal Ed                                        | 0.02     | 0.01           | 1.45           | 0.16              |

<sup>a</sup>Gap 1 was coded as 0 to reflect performance at the intercept. <sup>b</sup>Beginning of session was coded as −.05. End of session was coded as .05. <sup>c</sup>Female was coded as −.05. Male was coded as .05.

**Table S5.11.** Final models assessing the effect of delay (end of training, one-month delay) on production of words, whole word score with age in months.

| <b>Log Odds of Producing a Word Correctly</b> |                 |                       |                |                    |
|-----------------------------------------------|-----------------|-----------------------|----------------|--------------------|
|                                               | <b>Estimate</b> | <b>Standard Error</b> | <b>z value</b> | <b>Pr(&gt; z )</b> |
| Intercept                                     | 0.49            | 0.47                  | 1.03           | 0.30               |
| Time <sup>a</sup>                             | −0.94           | 0.30                  | −3.17          | < 0.001            |
| Age in months                                 | 0.04            | 0.02                  | 1.80           | 0.07               |
| Age × Time                                    | −0.03           | 0.02                  | −1.72          | 0.09               |
| Biological Sex <sup>b</sup>                   | 0.08            | 0.35                  | 0.23           | 0.82               |
| Condition, Contrast 1 <sup>c</sup>            | −0.38           | 0.48                  | −0.79          | 0.43               |
| Condition, Contrast 2 <sup>d</sup>            | 0.36            | 0.47                  | 0.76           | 0.45               |
| Condition × Time, Contrast 1                  | 0.17            | 0.41                  | 0.42           | 0.68               |
| Condition × Time, Contrast 2                  | −0.07           | 0.12                  | −0.56          | 0.58               |
| Maternal Ed                                   | 0.12            | 0.10                  | 1.26           | 0.21               |

<sup>a</sup>End of last training session was coded as −.05. Beginning of one-month session was coded as .05. <sup>b</sup>Female was coded as −.05. Male was coded as .05. <sup>c</sup>Retest at one week was coded as −1, Retest at two weeks was coded as 1, No retest was coded as 0. <sup>d</sup>Retest at one week was coded as −1, Retest at two weeks was coded as −1, No retest was coded as 2.

**Table S5.12.** Final models assessing the effect of delay (end of training, one-month delay) on production of words, phonological precision score with age in months.

| <b>Percentage of Phonetic Features Produced correctly</b> |                 |                       |                |                    |
|-----------------------------------------------------------|-----------------|-----------------------|----------------|--------------------|
|                                                           | <b>Estimate</b> | <b>Standard Error</b> | <b>t value</b> | <b>Pr(&gt; z )</b> |
| Intercept                                                 | 0.59            | 0.06                  | 9.35           | < 0.0001           |
| Time <sup>a</sup>                                         | −0.13           | 0.03                  | −4.40          | < 0.0001           |
| Age in months                                             | 0.003           | 0.004                 | 0.89           | 0.38               |
| Age × Time                                                | −0.0−0.4        | 0.003                 | −1.15          | 0.25               |
| Biological Sex <sup>b</sup>                               | 0.04            | 0.07                  | 0.64           | 0.52               |
| Condition, Contrast 1 <sup>c</sup>                        | −0.01           | 0.04                  | −0.34          | 0.74               |
| Condition, Contrast 2 <sup>d</sup>                        | 0.03            | 0.02                  | 1.13           | 0.26               |
| Condition × Time, Contrast 1                              | 0.08            | 0.04                  | 2.30           | 0.02               |
| Condition × Time, Contrast 2                              | 0.002           | 0.02                  | 0.10           | 0.92               |
| Maternal Ed                                               | 0.03            | 0.02                  | 1.36           | 0.18               |

<sup>a</sup>End of last training session was coded as −.05. Beginning of one-month session was coded as .05. <sup>b</sup>Female was coded as −.05. Male was coded as .05. <sup>c</sup>Retest at one week was coded as −1, Retest at two weeks was coded as 1, No retest was coded as 0. <sup>d</sup>Retest at one week was coded as −1, Retest at two weeks was coded as −1, No retest was coded as 2.
