# Supplementary material
Source: publisher figshare collection journal article supplement (https://asha.figshare.com/articles/dataset/_/19606150)
Supplement: Supplementary file [file 1]

**Supplemental Material S2.** Additional information about words trained each day for each child.

**Table S2.1.** Words that were retrieved and produced correctly in response to the Free Recall task at the beginning of each session. These words did not receive training during Training Blocks 1–3 on the day indicated. All words were trained for all children on Day 1.

| Participant | Day 2            | Day 3                                | Day 4                                                    | Day 5                                                              | Day 6                                                                         |
|-------------|------------------|--------------------------------------|----------------------------------------------------------|--------------------------------------------------------------------|-------------------------------------------------------------------------------|
| 16C0368     | /sibɫ/           | /sibɫ/                               | /dob/<br>/gramə/<br>/sibɫ/                               | /dob/<br>/gramə/<br>/kɪnt/<br>/mep/<br>/nedɪg/<br>/plun/<br>/sibɫ/ |                                                                               |
| 16C0377     | /gramə/          | /dob/<br>/gramə/<br>/mep/            | /dob/<br>/gramə/<br>/mep/<br>/nedɪg/<br>/plun/<br>/sibɫ/ |                                                                    |                                                                               |
| 16C0409     |                  | /mep/<br>/sibɫ/                      | /gramə/<br>/sibɫ/                                        | /dob/<br>/gramə/<br>/mep/<br>/plun/<br>/sibɫ/<br>/topɪn/           |                                                                               |
| 17C0406     |                  | /sibɫ/                               | /dob/<br>/gramə/<br>/mep/<br>/sibɫ/                      | /gramə/<br>/mep/<br>/sibɫ/                                         | /dob/<br>/mep/<br>/plun/<br>/sibɫ/                                            |
| 17C0426     |                  | /sibɫ/                               | /kɪnt/<br>/mep/                                          | /bɪnɪp/<br>/dob/<br>/kɪnt/<br>/mep/<br>/sibɫ/                      |                                                                               |
| 17J0453     |                  | /dob/<br>/gramə/<br>/plun/<br>/sibɫ/ | /dob/<br>/gramə/<br>/kɪnt/<br>/mep/<br>/plun/<br>/sibɫ/  | /dob/<br>/gramə/<br>/kɪnt/<br>/mep/<br>/plun/<br>/sibɫ/            | /bɪnɪp/<br>/dob/<br>/gramə/<br>/kɪnt/<br>/mep/<br>/nedɪg/<br>/plun/<br>/sibɫ/ |
| 17J0455     | /dob/            | /dob/                                | /dob/<br>/nedɪg/<br>/plun/<br>/sibɫ/                     | /dob/<br>/gramə/<br>/mep/<br>/nedɪg/<br>/plun/<br>/sibɫ/           | /dob/<br>/gramə/<br>/kɪnt/<br>/nedɪg/<br>/plun/<br>/sibɫ/                     |
| 18J0475     | /dob/<br>/gramə/ | /dob/<br>/gramə/                     | /dob/<br>/gramə/<br>/kɪnt/<br>/sibɫ/                     | /bɪnɪp/<br>/dob/<br>/gramə/<br>/kɪnt/<br>/plun/                    |                                                                               |

|           |                                                 |                                                                       |                                                                                  |                                                                                           |                                                  |
|-----------|-------------------------------------------------|-----------------------------------------------------------------------|----------------------------------------------------------------------------------|-------------------------------------------------------------------------------------------|--------------------------------------------------|
|           |                                                 |                                                                       |                                                                                  | /sibl/<br>/topɪn/                                                                         |                                                  |
| *18J0478  | /sibl/                                          | /dob/<br>/sibl/                                                       | /dob/<br>/kɪnɪt/<br>/mep/<br>/sibl/                                              | /dob/<br>/ɡrɑmə/<br>/kɪnɪt/<br>/sibl/                                                     | /dob/<br>/ɡrɑmə/<br>/kɪnɪt/<br>/sibl/            |
| 18J0479   | /plun/                                          | /mep/<br>/nedɪɡ/<br>/plun/                                            | /dob/<br>/mep/<br>/nedɪɡ/<br>/plun/<br>/sibl/                                    |                                                                                           |                                                  |
| 18J0482   | /dob/<br>/ɡrɑmə/<br>/kɪnɪt/<br>/plun/<br>/sibl/ |                                                                       |                                                                                  |                                                                                           |                                                  |
| 18J0487   |                                                 | /plun/                                                                | /plun/                                                                           | /bɪnɪp/<br>/ɡrɑmə/<br>/kɪnɪt/<br>/plun/<br>/sibl/                                         |                                                  |
| 18J0488   | /sibl/                                          | /bɪnɪp/<br>/dob/<br>/ɡrɑmə/<br>/kɪnɪt/<br>/plun/<br>/sibl/<br>/topɪn/ |                                                                                  |                                                                                           |                                                  |
| **18J0518 | /dob/<br>/kɪnɪt/<br>/nedɪɡ/<br>/topɪn/          | /ɡrɑmə/<br>/kɪnɪt/<br>/nedɪɡ/<br>/sibl/<br>/topɪn/                    | /bɪnɪp/<br>/ɡrɑmə/<br>/kɪnɪt/<br>/mep/<br>/nedɪɡ/<br>/plun/<br>/sibl/<br>/topɪn/ | /bɪnɪp/<br>/dob/<br>/ɡrɑmə/<br>/kɪnɪt/<br>/mep/<br>/nedɪɡ/<br>/plun/<br>/sibl/<br>/topɪn/ |                                                  |
| 18J0519   |                                                 |                                                                       | /dob/<br>/ɡrɑmə/<br>/plun/<br>/sibl/                                             | /dob/<br>/ɡrɑmə/<br>/kɪnɪt/<br>/sibl/                                                     | /dob/<br>/ɡrɑmə/<br>/plun/<br>/sibl/             |
| 18J0522   | /dob/<br>/ɡrɑmə/<br>/sibl/                      | /dob/<br>/ɡrɑmə/<br>/kɪnɪt/<br>/mep/<br>/nedɪɡ/<br>/sibl/             |                                                                                  |                                                                                           |                                                  |
| 18J0538   | /ɡrɑmə/<br>/kɪnɪt/<br>/nedɪɡ/                   | /ɡrɑmə/<br>/kɪnɪt/<br>/nedɪɡ/<br>/sibl/                               | /dob/<br>/ɡrɑmə/<br>/kɪnɪt/<br>/nedɪɡ/<br>/plun/                                 | /dob/<br>/ɡrɑmə/<br>/kɪnɪt/<br>/nedɪɡ/<br>/sibl/                                          | /dob/<br>/ɡrɑmə/<br>/kɪnɪt/<br>/nedɪɡ/<br>/plun/ |

|            |                                                 |                                                                                |                                                                      |                                                   |                                                                       |
|------------|-------------------------------------------------|--------------------------------------------------------------------------------|----------------------------------------------------------------------|---------------------------------------------------|-----------------------------------------------------------------------|
|            |                                                 |                                                                                | /sib /                                                               |                                                   | /sib /<br>/topin/                                                     |
| 18J0539    | /dob/<br>/gramə/<br>/topin/                     | /dob/<br>/gramə/<br>/nedɪg/<br>/plun/<br>/sib /<br>/topin/                     | /dob/<br>/gramə/<br>/mep/<br>/nedɪg/<br>/plun/<br>/sib /<br>/topin/  |                                                   |                                                                       |
| 18J0540    |                                                 |                                                                                |                                                                      | /mep/                                             |                                                                       |
| 18J0541    | /dob/<br>/gramə/<br>/nedɪg/<br>/plun/<br>/sib / | /bɪnɪp/<br>/dob/<br>/gramə/<br>/kɪnɪt/<br>/mep/<br>/nedɪg/<br>/plun/<br>/sib / |                                                                      |                                                   |                                                                       |
| ***18J0542 | /dob/<br>/sib /                                 | /dob/<br>/gramə/<br>/nedɪg/<br>/sib /                                          | /gramə/<br>/kɪnɪt/<br>/nedɪg/<br>/plun/<br>/sib /                    | /gramə/<br>/kɪnɪt/<br>/nedɪg/<br>/plun/<br>/sib / | /bɪnɪp/<br>/dob/<br>/gramə/<br>/kɪnɪt/<br>/nedɪg/<br>/plun/<br>/sib / |
| 18J0551    |                                                 |                                                                                | /kɪnɪt/                                                              | /gramə/<br>/kɪnɪt/<br>/topin/                     | /gramə/<br>/kɪnɪt/                                                    |
| 18J0555    | /dob/<br>/kɪnɪt/                                | /dob/<br>/gramə/<br>/kɪnɪt/<br>/mep/<br>/plun/<br>/sib /                       |                                                                      |                                                   |                                                                       |
| 18J0556    | /dob/<br>/plun/<br>/sib /                       |                                                                                |                                                                      |                                                   |                                                                       |
| 18J0560    | /dob/                                           | /dob/                                                                          | /dob/<br>/gramə/<br>/nedɪg/                                          | /dob/<br>/gramə/<br>/mep/<br>/nedɪg/              | /dob/<br>/gramə/                                                      |
| 18J0565    |                                                 |                                                                                | /plun/                                                               | /gramə/<br>/mep/<br>/plun/                        | /gramə/<br>/mep/<br>/plun/                                            |
| 18J0567    | /dob/                                           | /dob/<br>/gramə/<br>/sib /                                                     | /bɪnɪp/<br>/dob/<br>/gramə/<br>/kɪnɪt/<br>/mep/<br>/nedɪg/<br>/sib / |                                                   |                                                                       |
| 18J0568    | /dob/<br>/plun/<br>/topin/                      | /bɪnɪp/<br>/dob/<br>/kɪnɪt/<br>/mep/                                           | /bɪnɪp/<br>/dob/<br>/gramə/<br>/mep/                                 | /bɪnɪp/<br>/dob/<br>/gramə/<br>/kɪnɪt/            | /bɪnɪp/<br>/dob/<br>/gramə/<br>/kɪnɪt/                                |

|         |                                                |                                                           |                                                                     |                                                          |                                                            |
|---------|------------------------------------------------|-----------------------------------------------------------|---------------------------------------------------------------------|----------------------------------------------------------|------------------------------------------------------------|
|         |                                                | /plun/<br>/topɪn/                                         | /sɪbl/<br>/topɪn/                                                   | /mep/<br>/nedɪg/<br>/plun/<br>/sɪbl/<br>/topɪn/          | /mep/<br>/nedɪg/<br>/plun/<br>/sɪbl/<br>/topɪn/            |
| 18J0571 |                                                | /nedɪg/<br>/plun/                                         | /nedɪg/<br>/plun/                                                   | /mep/<br>/nedɪg/<br>/plun/<br>/sɪbl/                     | /bɪnɪp/<br>/dob/<br>/kɪnɪt/<br>/nedɪg/<br>/plun/<br>/sɪbl/ |
| 18J0572 | /kɪnɪt/                                        | /dob/                                                     | /dob/<br>/ɡrɑmə-/                                                   | /dob/<br>/kɪnɪt/                                         | /bɪnɪp/<br>/dob/<br>/ɡrɑmə-/<br>/sɪbl/                     |
| 18J0573 |                                                |                                                           | /plun/<br>/topɪn/                                                   | /dob/<br>/ɡrɑmə/<br>/plun/                               | /dob/<br>/ɡrɑmə/<br>/plun/                                 |
| 18J0574 | /topɪn/                                        | /topɪn/                                                   | /ɡrɑmə/<br>/nedɪg/<br>/plun/<br>/topɪn/                             |                                                          |                                                            |
| 19J0588 |                                                |                                                           | /plun/<br>/topɪn/                                                   |                                                          |                                                            |
| 19J0589 |                                                |                                                           | /plun/                                                              | /dob/<br>/plun/                                          | /dob/                                                      |
| 19J0593 | /bɪnɪp/<br>/ɡrɑmə/<br>/nedɪg/                  | /dob/<br>/ɡrɑmə/<br>/kɪnɪt/<br>/mep/<br>/nedɪg/<br>/sɪbl/ | /bɪnɪp/<br>/dob/<br>/ɡrɑmə/<br>/mep/<br>/nedɪg/<br>/plun/<br>/sɪbl/ |                                                          |                                                            |
| 19J0595 | /dob/<br>/ɡrɑmə/<br>/mep/<br>/nedɪg/<br>/sɪbl/ | /dob/<br>/ɡrɑmə/<br>/mep/<br>/nedɪg/<br>/sɪbl/<br>/topɪn/ |                                                                     |                                                          |                                                            |
| 19J0597 | /dob/<br>/nedɪg/                               | /plun/                                                    | /dob/<br>/plun/<br>/topɪn/                                          | /dob/<br>/ɡrɑmə/<br>/mep/<br>/plun/<br>/sɪbl/<br>/topɪn/ |                                                            |
| 19J0598 | /nedɪg/                                        | /nedɪg/                                                   | /nedɪg/<br>/sɪbl/                                                   | /ɡrɑmə/<br>/nedɪg/                                       | /ɡrɑmə/<br>/nedɪg/<br>/sɪbl/<br>/topɪn/                    |
| 19J0599 | /dob/                                          | /dob/                                                     | /dob/<br>/nedɪg/<br>/sɪbl/                                          | /dob/<br>/nedɪg/<br>/sɪbl/                               | /dob/<br>/nedɪg/<br>/plun/<br>/sɪbl/                       |
| 19J0601 | /sɪbl/                                         | /bɪnɪp/<br>/ɡrɑmə-/                                       | /dob/<br>/ɡrɑmə-/                                                   | /dob/<br>/ɡrɑmə-/                                        | /dob/<br>/ɡrɑmə-/                                          |

|         |       |                                     |                                               |                                                 |                                                           |
|---------|-------|-------------------------------------|-----------------------------------------------|-------------------------------------------------|-----------------------------------------------------------|
|         |       | /plun/<br>/sibl/                    | /nedɪg/<br>/sibl/                             | /kɪnt/<br>/mep/<br>/nedɪg/<br>/sibl/<br>/topɪn/ | /kɪnt/<br>/mep/<br>/nedɪg/<br>/plun/<br>/sibl/<br>/topɪn/ |
| 19J0602 | /mep/ | /mep/                               | /dob/<br>/kɪnt/<br>/mep/<br>/nedɪg/<br>/plun/ |                                                 |                                                           |
| 19J0604 | /dob/ | /dob/<br>/mep/<br>/nedɪg/<br>/sibl/ |                                               |                                                 |                                                           |
| 19J0605 | /dob/ | /dob/<br>/plun/                     | /dob/<br>/plun/<br>/sibl/<br>/topɪn/          | /dob/<br>/plun/<br>/sibl/<br>/topɪn/            |                                                           |

\*18J0478 incorrectly said /plun/ for the target form /plun/ at beginning of session Free Recall on Days 3 through 6. However, the participant was not re-trained on this form during any of those sessions.

\*\*18J0518 correctly said target forms /mep/ and /topɪn/ at beginning of session Free Recall on Day 5. The examiner retrained the forms in error.

\*\*\*18J0542 correctly said target form /nedɪg/ at beginning of session Free Recall on Day 5. The examiner retrained the form in error.
