# Supplementary material
Source: publisher figshare collection journal article supplement (https://asha.figshare.com/articles/dataset/_/19606150)
Supplement: Supplementary file [file 1]

**Supplemental Material S3.** Performance of individual children including the number of words correct at the last training day, and number of words trained to criterion.

**Table S3.1.** Number of words correct at the end of the last training day out of 9 trained forms. Only words produced with 100% phonological precision are included, with an exception for liquid simplification productions made for /gramə/. See Supplemental Material S1.

|         | <b>Total<br/>Training<br/>Days</b> | <b>Words<br/>Correct<br/>Free Recall</b> | <b>Words<br/>Correct<br/>Cued Recall</b> | <b>Words<br/>Demonstrated<br/>Criterion</b> |
|---------|------------------------------------|------------------------------------------|------------------------------------------|---------------------------------------------|
| 16C0368 | 5                                  | 3                                        | 8                                        | 8                                           |
| 16C0377 | 4                                  | 7                                        | 9                                        | 9                                           |
| 16C0409 | 5                                  | 6                                        | 9                                        | 8                                           |
| 17C0406 | 6                                  | 6                                        | 7                                        | 7                                           |
| 17C0426 | 5                                  | 5                                        | 9                                        | 9                                           |
| 17J0453 | 6                                  | 9                                        | 9                                        | 9                                           |
| 17J0455 | 6                                  | 6                                        | 6                                        | 6                                           |
| 18J0475 | 5                                  | 7                                        | 9                                        | 9                                           |
| 18J0478 | 6                                  | 5                                        | 5                                        | 5                                           |
| 18J0479 | 4                                  | 8                                        | 9                                        | 9                                           |
| 18J0482 | 2                                  | 9                                        | 9                                        | 9                                           |
| 18J0487 | 5                                  | 1                                        | 9                                        | 9                                           |
| 18J0488 | 3                                  | 9                                        | 9                                        | 9                                           |
| 18J0518 | 5                                  | 8                                        | 8                                        | 8                                           |
| 18J0519 | 6                                  | 4                                        | 8                                        | 7                                           |
| 18J0522 | 3                                  | 8                                        | 9                                        | 9                                           |
| 18J0538 | 6                                  | 6                                        | 9                                        | 9                                           |
| 18J0539 | 4                                  | 8                                        | 9                                        | 9                                           |
| 18J0540 | 6                                  | 0                                        | 5                                        | 5                                           |
| 18J0541 | 3                                  | 8                                        | 9                                        | 9                                           |
| 18J0542 | 6                                  | 8                                        | 8                                        | 8                                           |
| 18J0551 | 6                                  | 2                                        | 4                                        | 4                                           |
| 18J0555 | 3                                  | 8                                        | 9                                        | 9                                           |
| 18J0556 | 2                                  | 5                                        | 9                                        | 9                                           |
| 18J0560 | 6                                  | 6                                        | 7                                        | 7                                           |
| 18J0565 | 6                                  | 4                                        | 9                                        | 9                                           |
| 18J0567 | 4                                  | 5                                        | 9                                        | 9                                           |
| 18J0568 | 6                                  | 6                                        | 8                                        | 8                                           |
| 18J0571 | 6                                  | 7                                        | 8                                        | 8                                           |
| 18J0572 | 6                                  | 5                                        | 7                                        | 7                                           |
| 18J0573 | 6                                  | 1                                        | 8                                        | 6                                           |
| 18J0574 | 4                                  | 7                                        | 9                                        | 9                                           |
| 19J0588 | 4                                  | 6                                        | 9                                        | 9                                           |
| 19J0589 | 6                                  | 1                                        | 1                                        | 1                                           |
| 19J0593 | 4                                  | 8                                        | 9                                        | 9                                           |

|                           |             |             |             |             |
|---------------------------|-------------|-------------|-------------|-------------|
| 19J0595                   | 3           | 7           | 9           | 9           |
| 19J0597                   | 5           | 7           | 9           | 9           |
| 19J0598                   | 6           | 4           | 7           | 7           |
| 19J0599                   | 6           | 5           | 7           | 7           |
| 19J0601                   | 6           | 6           | 9           | 9           |
| 19J0602                   | 4           | 4           | 8           | 8           |
| 19J0604                   | 3           | 8           | 9           | 9           |
| 19J0605                   | 5           | 4           | 9           | 9           |
| Mean (standard deviation) | 4.84 (1.27) | 5.74 (2.33) | 8.02 (1.67) | 7.93 (1.70) |
